# Supplementary material
Source: PubMed Central journal article supplement (PMC3752242)
Supplement: 1303275110_pnas.201303275SI.pdf [file 1303275110_pnas.201303275SI.pdf]

# Supporting Information

Pang et al. 10.1073/pnas.1303275110

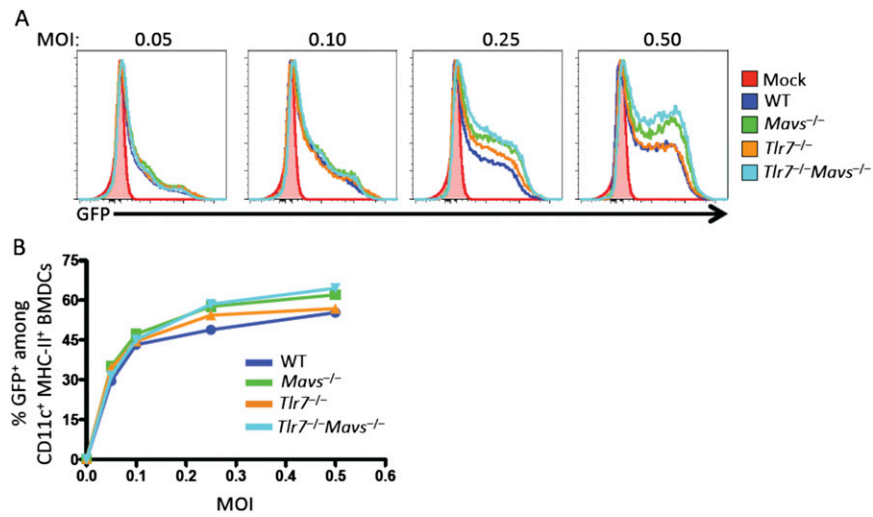

**Fig. S1.** The mitochondrial antiviral signaling (MAVS) and Toll-like receptor (TLR)7 signaling pathways protect against influenza virus replication in bone-marrow dendritic cells. GM-CSF cultured bone marrow-derived dendritic cells (BMDCs) from WT, *Tlr7*<sup>-/-</sup>, *Mavs*<sup>-/-</sup>, and *Tlr7*<sup>-/-</sup>*Mavs*<sup>-/-</sup> mice were infected with PR8 NS1-GFP virus at the indicated multiplicity of infection (MOI). At 12 h postinfection, cells were harvested and stained for FACS analysis. Histograms (A) and frequencies (B) of GFP<sup>+</sup> BMDCs are shown. All samples were gated on live CD11c<sup>+</sup> MHC-II<sup>+</sup> cells. Data represent the mean ± SEM.







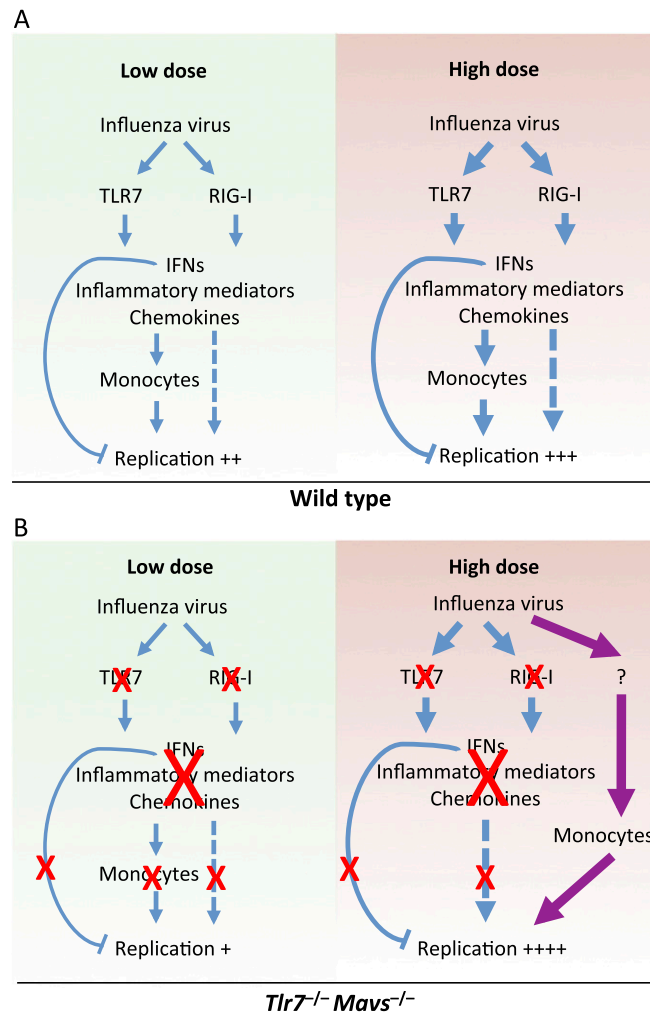

**Fig. S7.** Proposed model for the role of TLR7 and RIG-I pathways in virus replication during respiratory influenza A virus (IAV) infection. After a low dose of influenza infection, TLR7- and RIG-I-mediated signaling activates the induction of proinflammatory cytokines and chemokines, leading to recruitment of monocytes from the blood, which rapidly differentiate into mono-DCs in the lung. Mono-DCs are highly susceptible to IAV and serve as viral reservoirs during infection, providing a way for the virus to promote its replication in the airway (A, Left). In the absence of TLR7 and MAVS, production of inflammatory mediators and recruitment of monocytes into the lung are severely impaired, resulting in a lower viral load in the airway of *Tlr7<sup>-/-</sup>Mavs<sup>-/-</sup>* mice (B, Left). Following a high dose of IAV challenge (A and B, Right), a compensatory pathway (purple arrows in B) in the absence of TLR7 or MAVS induces monocyte infiltration into the lung, rendering them susceptible to IAV infection in the respiratory tract of *Tlr7<sup>-/-</sup>Mavs<sup>-/-</sup>* mice. Signals downstream of TLR7 or MAVS also promote influenza virus replication independent of monocytes (depicted by dotted lines).
